# Supplementary material for: Cu–Organic framework-derived V-doped carbon nanostructures for organic dye removal
Source: Royal Society of Chemistry journal article supplement (doi:10.1039/d1dt03450b), 2021-01-01
Supplement: d1dt03450b1.pdf [file d1dt03450b1.pdf]

## Supporting Information

### Cu-organic framework-derived V-doped carbon nanostructures for organic dye removal

Xiao-Sa Zhang,<sup>a</sup> Hong-Tian Zhao,<sup>a</sup> Yu Liu,<sup>a</sup> Wen-Ze Li,<sup>a\*</sup> Ai-Ai Yang<sup>a</sup> and Jian Luan<sup>b\*</sup>

<sup>a</sup> College of Sciences, Shenyang University of Chemical Technology, Shenyang, 110142, P. R. China

<sup>b</sup> College of Sciences, Northeastern University, Shenyang, 100819, P. R. China

E-mail: [liwENZE@syuct.edu.cn](mailto:liwENZE@syuct.edu.cn) (W. Z. Li); [2010044@stu.neu.edu.cn](mailto:2010044@stu.neu.edu.cn) (J. Luan)

**Table S1 Crystallographic data for complex 1**

| Complex                                                         | 1                                                               |
|-----------------------------------------------------------------|-----------------------------------------------------------------|
| Formula                                                         | C <sub>28</sub> H <sub>22</sub> Cu <sub>3</sub> O <sub>14</sub> |
| Formula wt                                                      | 773.08                                                          |
| Crystal system                                                  | Monoclinic                                                      |
| Space group                                                     | <i>P</i> 21/ <i>c</i>                                           |
| <i>T</i> (K)                                                    | 296(2)                                                          |
| <i>a</i> (Å)                                                    | 5.9687(4)                                                       |
| <i>b</i> (Å)                                                    | 29.7669(18)                                                     |
| <i>c</i> (Å)                                                    | 7.6708(5)                                                       |
| $\alpha$ (°)                                                    | 90                                                              |
| $\beta$ (°)                                                     | 93.6970(10)                                                     |
| $\gamma$ (°)                                                    | 90                                                              |
| <i>V</i> (Å <sup>3</sup> )                                      | 1360.03(15)                                                     |
| <i>Z</i>                                                        | 2                                                               |
| <i>D</i> <sub>calc</sub> (g cm <sup>-3</sup> )                  | 1.888                                                           |
| <i>F</i> (000)                                                  | 778                                                             |
| $\theta$ <sub>max</sub> (°)                                     | 26.51                                                           |
| <i>R</i> <sub>int</sub>                                         | 0.0374                                                          |
| <i>R</i> <sub>1</sub> <sup>a</sup> [ <i>I</i> > 2σ( <i>I</i> )] | 0.0436                                                          |
| w <i>R</i> <sub>2</sub> <sup>b</sup> (all data)                 | 0.1142                                                          |
| GOF                                                             | 1.031                                                           |

$$^a R_1 = \sum ||F_o| - |F_c|| / \sum |F_o|, \quad ^b wR_2 = \sum [w(F_o^2 - F_c^2)^2] / \sum [w(F_o^2)^2]^{1/2}.$$

**Table S2** Selected bond distances (Å) and angles (°) for complex **1**.

|                         |            |                        |            |
|-------------------------|------------|------------------------|------------|
| Cu(1) - O(6)            | 1.914(4)   | O(1W) - Cu(2)          | 1.945(4)   |
| Cu(1) - O(6)#1          | 1.914(4)   | Cu(2) - O(3)           | 1.905(4)   |
| Cu(1) - O(2)#1          | 1.955(4)   | Cu(2) - O(6)           | 1.969(4)   |
| Cu(1) - O(2)            | 1.955(4)   | Cu(2) - O(6)#2         | 2.091(4)   |
| O(1) - Cu(2)            | 2.122(4)   | O(6) - Cu(1) - O(6)#1  | 180        |
| O(6) - Cu(1) - O(2)#1   | 88.54(17)  | O(3) - Cu(2) - O(6)#2  | 143.01(18) |
| O(6)#1 - Cu(1) - O(2)#1 | 91.46(17)  | O(1W) - Cu(2) - O(6)#2 | 91.49(17)  |
| O(6) - Cu(1) - O(2)     | 91.46(17)  | O(6) - Cu(2) - O(6)#2  | 81.52(15)  |
| O(6)#1 - Cu(1) - O(2)   | 88.53(17)  | O(3) - Cu(2) - O(1)    | 130.62(19) |
| O(2)#1 - Cu(1) - O(2)   | 179.998(2) | O(1W) - Cu(2) - O(1)   | 90.26(15)  |
| O(3) - Cu(2) - O(1W)    | 92.84(18)  | O(6) - Cu(2) - O(1)    | 92.00(16)  |
| O(3) - Cu(2) - O(6)     | 91.13(17)  | O(6)#2 - Cu(2) - O(1)  | 86.04(17)  |
| O(1W) - Cu(2) - O(6)    | 172.49(18) |                        |            |

Symmetry codes: #1 -x + 1, -y + 1, -z + 1; #2 -x, -y + 1, -z + 1.

**Table S3** BET surface areas, pore volumes and pore sizes of synthesized carbon nanostructures.

| Samples         | Surface Area                                       |                                                  | Pore Volume                                             |                                                      | Pore Size                                           |                                    |
|-----------------|----------------------------------------------------|--------------------------------------------------|---------------------------------------------------------|------------------------------------------------------|-----------------------------------------------------|------------------------------------|
|                 | BET Surface Area (m <sup>2</sup> g <sup>-1</sup> ) | Micropore Area (m <sup>2</sup> g <sup>-1</sup> ) | External Surface Area (m <sup>2</sup> g <sup>-1</sup> ) | Total pore volume (cm <sup>3</sup> g <sup>-1</sup> ) | Micropore volume (cm <sup>3</sup> g <sup>-1</sup> ) | Adsorption average pore width (nm) |
| <b>C-1-600</b>  | 33.13                                              | 21.36                                            | 11.77                                                   | 0.0922                                               | 0.0115                                              | 11.13                              |
| <b>C-1</b>      | 58.42                                              | 54.47                                            | 46.87                                                   | 0.5678                                               | 0.0259                                              | 19.44                              |
| <b>C-1-1000</b> | 44.79                                              | 32.47                                            | 12.32                                                   | 0.1675                                               | 0.0173                                              | 14.96                              |
| <b>C-Mo-1</b>   | 76.42                                              | 48.37                                            | 28.05                                                   | 0.1853                                               | 0.0259                                              | 9.7                                |
| <b>C-W-1</b>    | 80.95                                              | 38.44                                            | 42.51                                                   | 0.2001                                               | 0.0207                                              | 9.89                               |
| <b>C-S-1</b>    | 82.63                                              | 71.41                                            | 11.22                                                   | 0.3509                                               | 0.0359                                              | 16.99                              |
| <b>C-V-600</b>  | 40.11                                              | 20.87                                            | 19.24                                                   | 0.1579                                               | 0.011                                               | 15.75                              |
| <b>C-V-1</b>    | 84.18                                              | 82.49                                            | 71.36                                                   | 0.6467                                               | 0.0351                                              | 15.36                              |
| <b>C-V-1000</b> | 69.03                                              | 50.77                                            | 18.25                                                   | 0.1766                                               | 0.0272                                              | 10.23                              |

**Table S4** Organic dyes with different charge types and sizes.

| Dye                    | Formula                                                                             | Charge type | Size (nm × nm × nm) |
|------------------------|-------------------------------------------------------------------------------------|-------------|---------------------|
| Methylene Blue<br>(MB) | 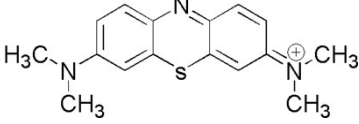   | Cationic    | 0.40 × 0.79 × 1.63  |
| Rhodamine B<br>(RhB)   |    | Cationic    | 0.68 × 1.18 × 1.57  |
| Gentian Violet<br>(GV) |  | Cationic    | 0.40 × 1.30 × 1.37  |
| Methyl Orange<br>(MO)  |  | Anionic     | 0.53 × 0.73 × 1.74  |
| Congo Red<br>(CR)      |  | Anionic     | 0.39 × 0.86 × 2.61  |

**Table S5** Thermodynamic parameters at different temperatures.

| Dye | T (K) | $\Delta G$ (kJ mol <sup>-1</sup> ) | $\Delta H$ (kJ mol <sup>-1</sup> ) | $\Delta S$ (kJ mol <sup>-1</sup> K <sup>-1</sup> ) |
|-----|-------|------------------------------------|------------------------------------|----------------------------------------------------|
| MB  | 298   | -7.094                             | 1.180                              | 0.028                                              |
|     | 303   | -7.233                             |                                    |                                                    |
|     | 313   | -7.511                             |                                    |                                                    |
|     | 323   | -7.788                             |                                    |                                                    |
| RhB | 298   | -6.666                             | 0.791                              | 0.025                                              |
|     | 303   | -6.791                             |                                    |                                                    |
|     | 313   | -7.041                             |                                    |                                                    |
|     | 323   | -7.291                             |                                    |                                                    |
| GV  | 298   | -7.182                             | 1.881                              | 0.030                                              |
|     | 303   | -7.334                             |                                    |                                                    |
|     | 313   | -7.639                             |                                    |                                                    |
|     | 323   | -7.943                             |                                    |                                                    |
| MO  | 298   | -4.788                             | 0.933                              | 0.019                                              |
|     | 303   | -4.884                             |                                    |                                                    |
|     | 313   | -5.075                             |                                    |                                                    |
|     | 323   | -5.267                             |                                    |                                                    |
| CR  | 298   | -5.040                             | 0.408                              | 0.018                                              |
|     | 303   | -5.131                             |                                    |                                                    |
|     | 313   | -5.314                             |                                    |                                                    |
|     | 323   | -5.497                             |                                    |                                                    |

**Table S6** Pseudo-first-order kinetic parameters for the photodegradation of CR by C-V-1.

| Dye | Concentration (mg L <sup>-1</sup> ) | Rate Constant $k$ (min <sup>-1</sup> ) | Half-life $t_{1/2}$ (min) | $R^2$  |
|-----|-------------------------------------|----------------------------------------|---------------------------|--------|
| MB  | 10                                  | 0.0067                                 | 103.61                    | 0.7943 |
| RhB | 10                                  | 0.0060                                 | 115.91                    | 0.9354 |
| GV  | 10                                  | 0.1080                                 | 6.42                      | 0.9586 |
| MO  | 40                                  | 0.0051                                 | 135.65                    | 0.9326 |
| CR  | 80                                  | 0.0052                                 | 134.07                    | 0.9710 |

**Table S7** Comparison of the adsorption and photocatalytic capacities and rates of variety dyes by C-V-1.

| Dye | Concentration (mg L <sup>-1</sup> ) | Adsorption capacity (mg g <sup>-1</sup> ) | Adsorption rate (%) | Degradation capacity (mg g <sup>-1</sup> ) | Degradation rate (%) |
|-----|-------------------------------------|-------------------------------------------|---------------------|--------------------------------------------|----------------------|
| MB  | 10                                  | 174.13                                    | 87.07               | 176.28                                     | 88.14                |
| RhB | 10                                  | 147.06                                    | 73.53               | 159.60                                     | 79.80                |
| GV  | 10                                  | 179.92                                    | 89.96               | 198.02                                     | 99.01                |
| MO  | 10                                  | 137.96                                    | 68.98               | 142.62                                     | 71.31                |
| CR  | 10                                  | 132.96                                    | 66.48               | 143.82                                     | 71.19                |

**Table S8** Comparison of the adsorption/photodegradation efficiencies with other V-contained materials.

| Material                                                                                                             | Dye | Type             | Equilibrium time (min) | Material Weigh (mg) | C <sub>0</sub> (mg L <sup>-1</sup> ) | Degradation rate (%) | q <sub>max</sub> (mg g <sup>-1</sup> ) | Ref.      |
|----------------------------------------------------------------------------------------------------------------------|-----|------------------|------------------------|---------------------|--------------------------------------|----------------------|----------------------------------------|-----------|
| V-doped CaTiO <sub>3</sub>                                                                                           | MB  | Photodegradation | 120                    | 100                 | 10                                   | 94                   | —                                      | S1        |
| V-doped WO <sub>3</sub>                                                                                              | MB  | Photodegradation | 120                    | 10                  | 10                                   | 66                   | —                                      | S2        |
| V-doped WO <sub>3</sub>                                                                                              | RhB | Photodegradation | 180                    | 40                  | 150                                  | 93                   | —                                      | S3        |
| V-modified N/Si co-doped TiO <sub>2</sub>                                                                            | MB  | Photodegradation | 360                    | 10                  | 0.05                                 | 90                   | —                                      | S4        |
| Ni-doped V <sub>2</sub> O <sub>5</sub>                                                                               | RhB | Photodegradation | 150                    | 50                  | 0.1                                  | 100                  | —                                      | S5        |
| V-supported CoFe <sub>2</sub> O <sub>4</sub>                                                                         | MB  | Photodegradation | 8                      | 15                  | 0.1                                  | 100                  | —                                      | S6        |
| chitosan-V-Ti-magnetite composite                                                                                    | CR  | Adsorption       | 2880                   | 80                  | 100                                  | —                    | 90                                     | S7        |
| Fe@V-carbon nanofiber                                                                                                | MO  | Photodegradation | 10                     | 10                  | 20                                   | 90                   | —                                      | S8        |
|                                                                                                                      | RhB | Photodegradation | 20                     | 10                  | 20                                   | 100                  | —                                      |           |
| [Zn <sub>3</sub> (4-atrz) <sub>6</sub> V <sub>6</sub> O <sub>18</sub> ]·4H <sub>2</sub> O                            | MB  | Photodegradation | 180                    | 150                 | 10                                   | 76                   | —                                      | S9        |
|                                                                                                                      | RhB | Photodegradation | 180                    | 150                 | 5                                    | 12                   | —                                      |           |
| atz = amino-1,2,4-triazole                                                                                           | MO  | Photodegradation | 180                    | 150                 | 10                                   | 19                   | —                                      |           |
| [Ag <sub>4</sub> (Hpyttz) <sub>2</sub> (H <sub>2</sub> pyttz)][HVW <sub>12</sub> O <sub>40</sub> ]·3H <sub>2</sub> O | MB  | Photodegradation | 210                    | 50                  | 10                                   | 58                   | —                                      |           |
| H <sub>2</sub> pyttz = 5'-(pyridin-4-yl)-1H,2'H-3,3'-bi(1,2,4-triazole)                                              | RhB | Photodegradation | 210                    | 50                  | 3                                    | 40                   | —                                      | S10       |
| [V <sub>2</sub> O <sub>6</sub> Zn(4-dpye)] <sub>n</sub>                                                              | MB  | Photodegradation | 90                     | 150                 | 10                                   | 93                   | —                                      |           |
| 4-dpye = N,N'-bis(4-pyridinecarb oxamide)-1,2-ethane                                                                 | RhB | Photodegradation | 90                     | 150                 | 10                                   | 37                   | —                                      | S11       |
| <b>C-V-1</b>                                                                                                         | MB  | Adsorption       | 240                    | 5                   | 10                                   | —                    | 170                                    |           |
|                                                                                                                      | RhB | Adsorption       | 240                    | 5                   | 10                                   | —                    | 145                                    |           |
|                                                                                                                      | GV  | Adsorption       | 240                    | 5                   | 10                                   | —                    | 175                                    |           |
|                                                                                                                      | MO  | Adsorption       | 240                    | 5                   | 40                                   | —                    | 273                                    |           |
|                                                                                                                      | CR  | Adsorption       | 240                    | 5                   | 80                                   | —                    | 605                                    | This work |
|                                                                                                                      | MB  | Photodegradation | 240                    | 5                   | 10                                   | 88                   | —                                      |           |
|                                                                                                                      | RhB | Photodegradation | 240                    | 5                   | 10                                   | 79                   | —                                      |           |
|                                                                                                                      | GV  | Photodegradation | 240                    | 5                   | 10                                   | 99                   | —                                      |           |
|                                                                                                                      | MO  | Photodegradation | 240                    | 5                   | 40                                   | 71                   | —                                      |           |
|                                                                                                                      | CR  | Photodegradation | 240                    | 5                   | 80                                   | 71                   | —                                      |           |

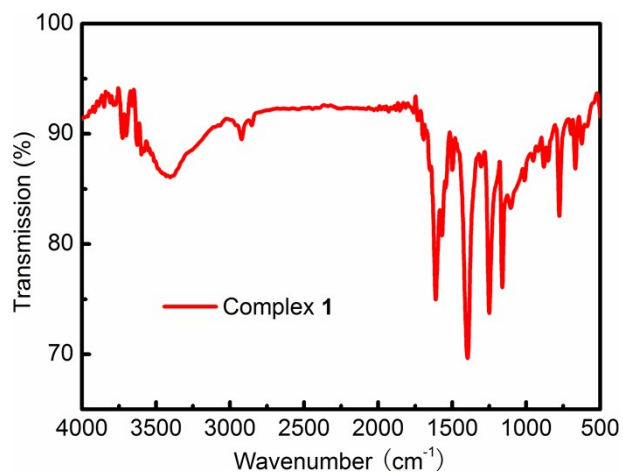

**Figure S1** The IR spectrum of complex 1.

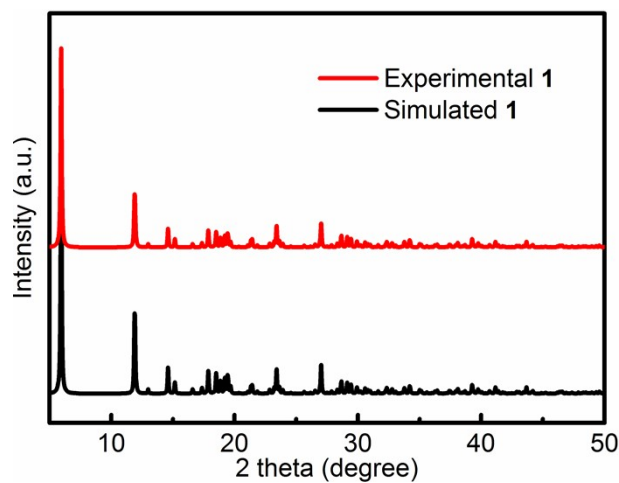

**Figure S2** The PXRD patterns of simulated and fresh sample for complex 1.

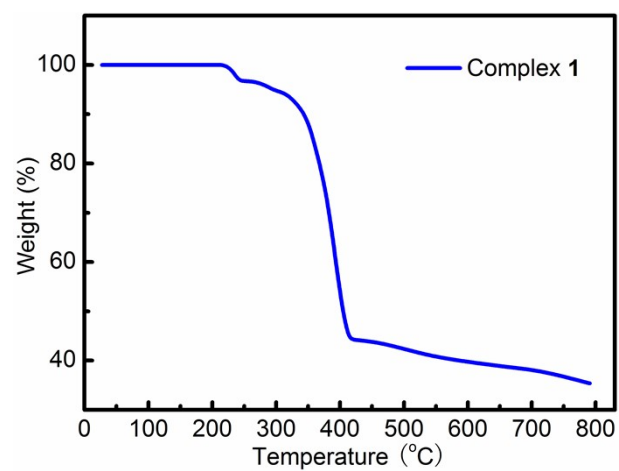

**Figure S3** The TG curve of complex 1.

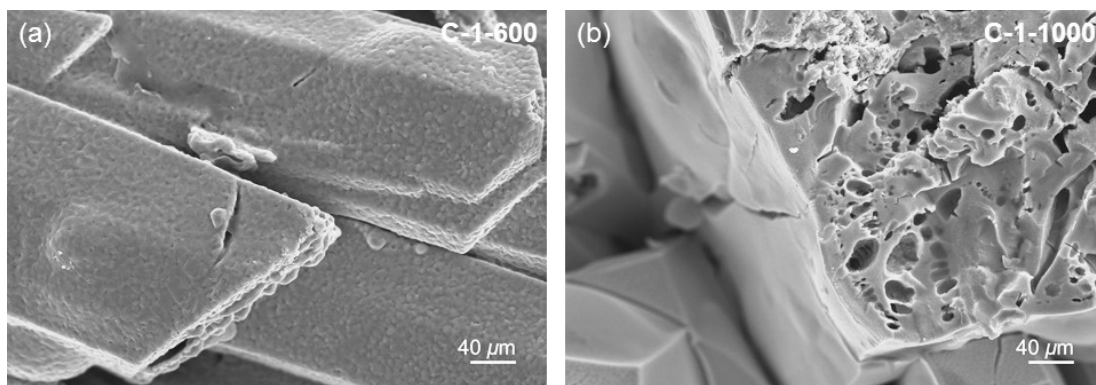

**Figure S4** SEM images of C-1-600 (a) and C-1-1000 (b).

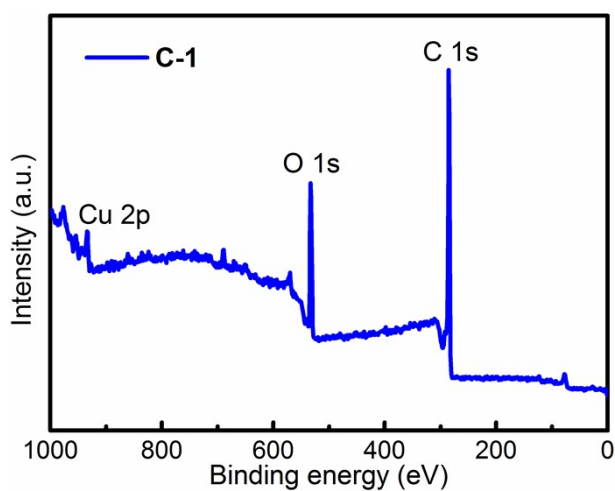

**Figure S5** XPS spectrum of C-1.

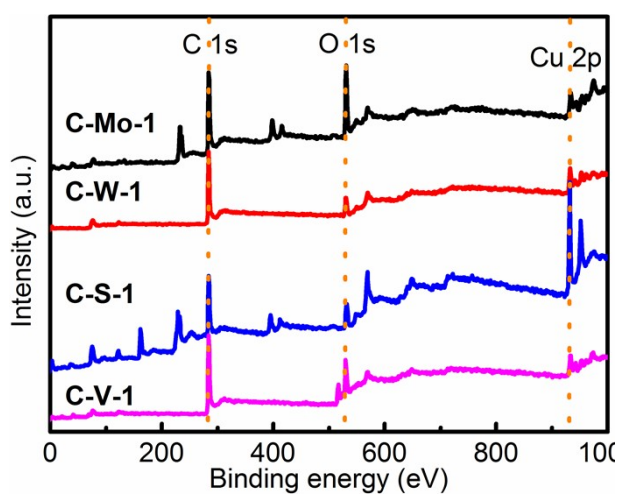

**Figure S6** XPS spectra of C-Mo-1, C-W-1, C-S-1 and C-V-1.

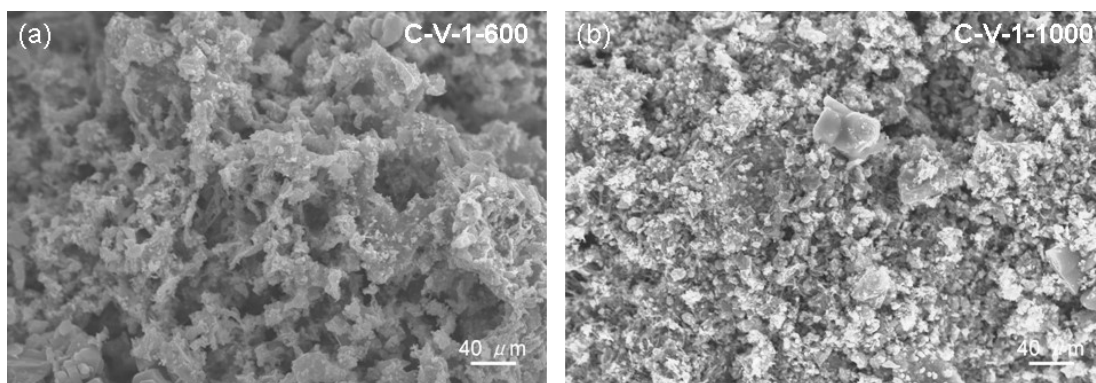

**Figure S7** SEM images of C-V-1-600 (a) and C-V-1-1000 (b).

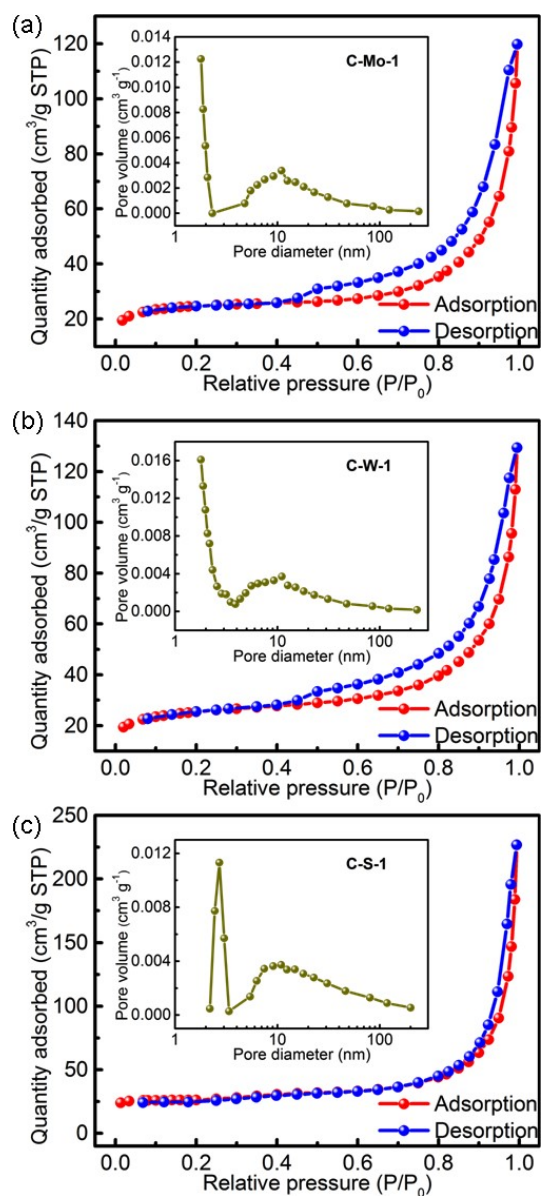

**Figure S8** Nitrogen adsorption and desorption isotherms (Insert: the pore size distribution) of C-Mo-1 (a), C-W-1 (b) and C-S-1 (c).



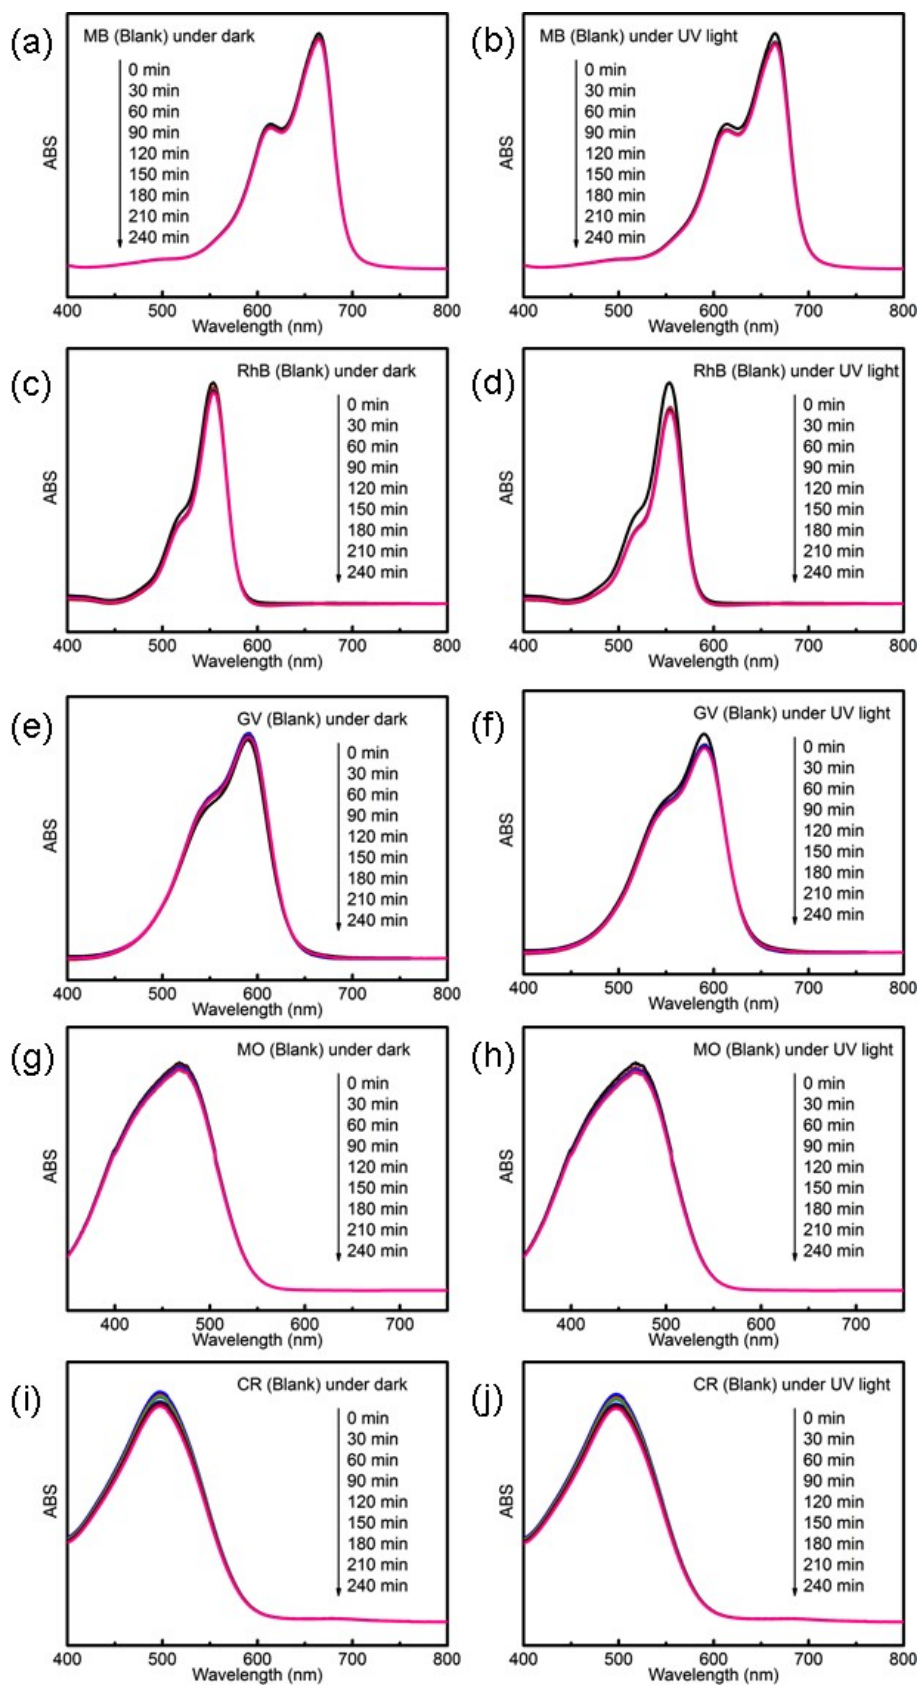

**Figure S9** UV-vis spectra of blank experiment for dye adsorption and photocatalysis (performed in the absence of any catalyst).

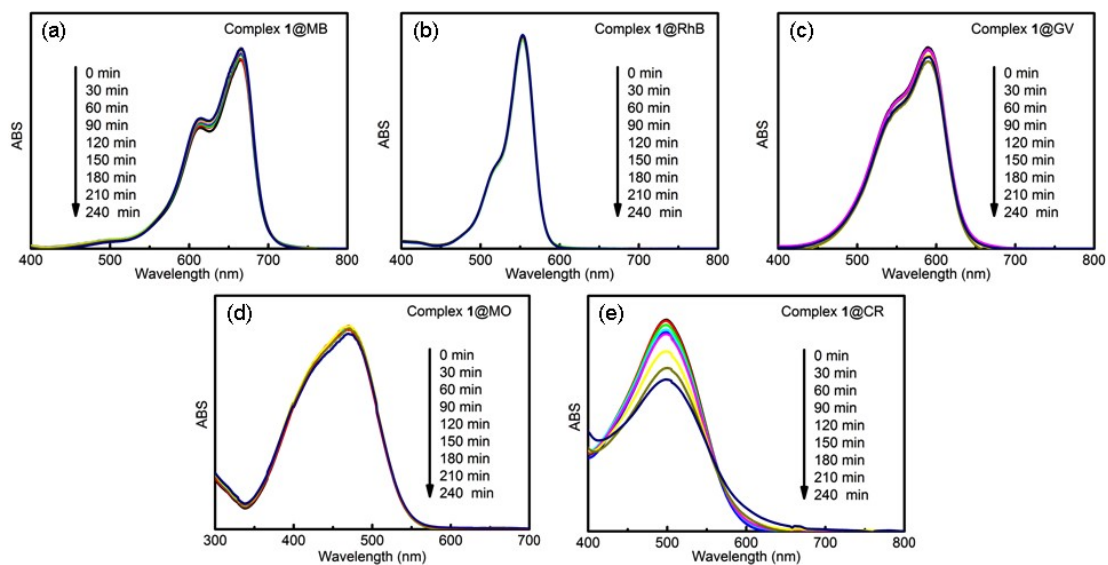

**Figure S10** UV-vis spectra of MB (a), RhB (b), GV (c), MO (d) and CR (e) solutions recorded after different adsorption times with complex **1**.

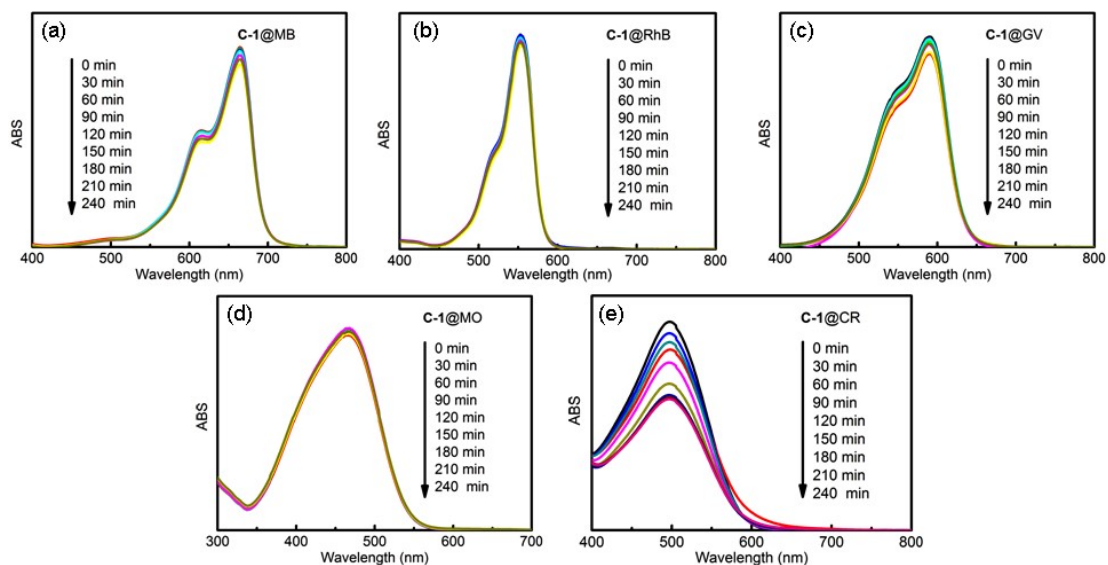

**Figure S11** UV-vis spectra of MB (a), RhB (b), GV (c), MO (d) and CR (e) solutions recorded after different adsorption times with **C-1**.

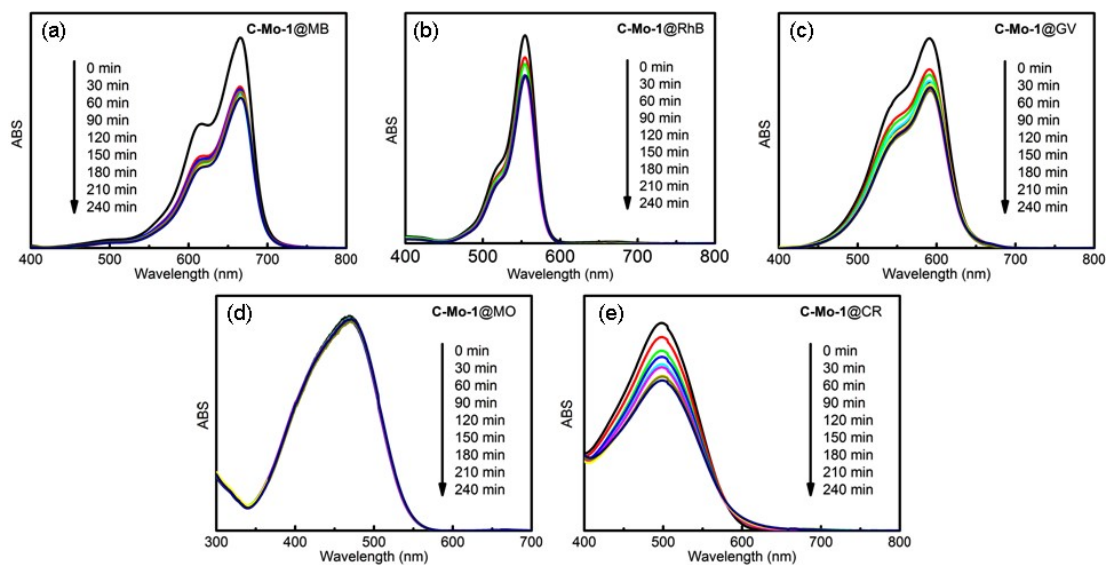

**Figure S12** UV-vis spectra of MB (a), RhB (b), GV (c), MO (d) and CR (e) solutions recorded after different adsorption times with **C-Mo-1**.

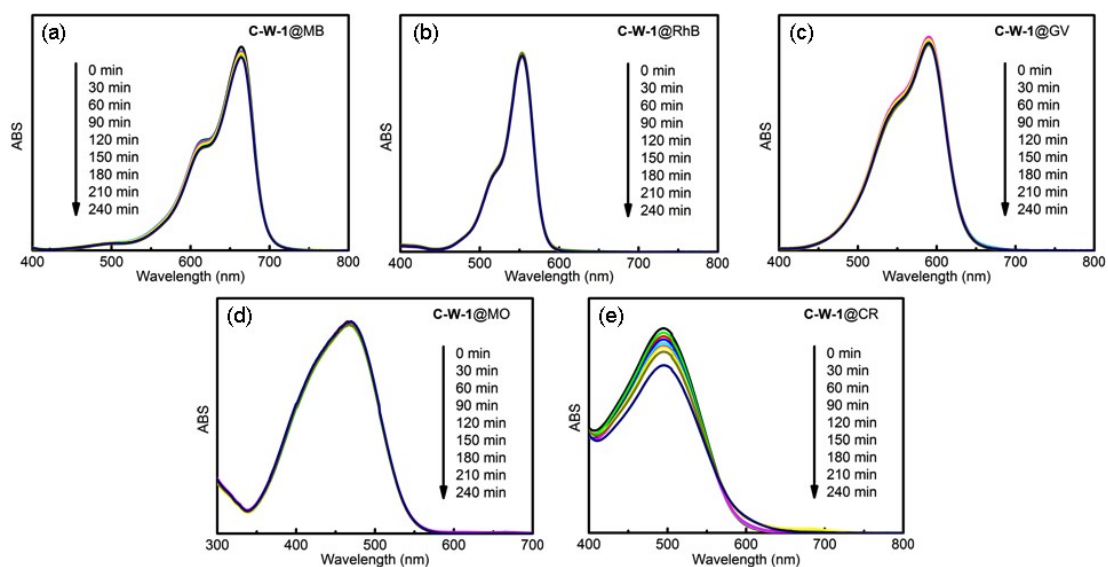

**Figure S13** UV-vis spectra of MB (a), RhB (b), GV (c), MO (d) and CR (e) solutions recorded after different adsorption times with **C-W-1**.

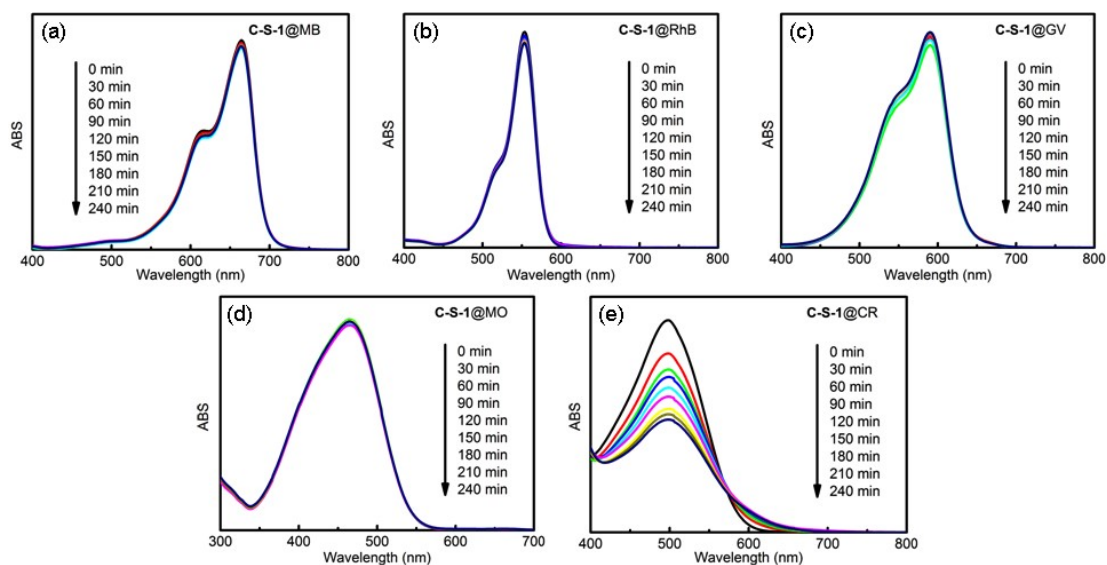

**Figure S14** UV-vis spectra of MB (a), RhB (b), GV (c), MO (d) and CR (e) solutions recorded after different adsorption times with C-S-1.

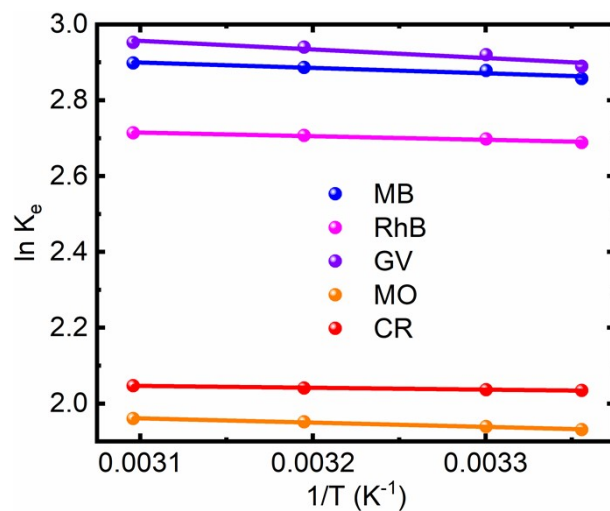

**Figure S15** The plot of  $\ln K_e$ - $1/T$  for adsorption of MB, RhB, GV, MO and CR on C-V-1.

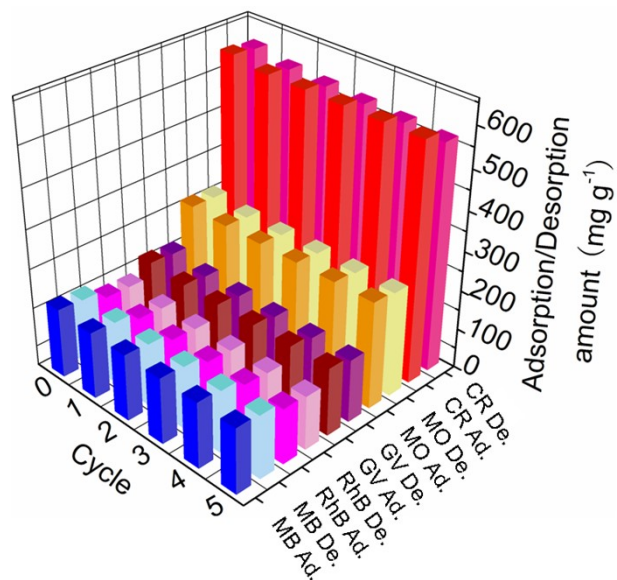

**Figure S16** The cycling stability of the adsorption/desorption of dyes on the **C-V-1**.

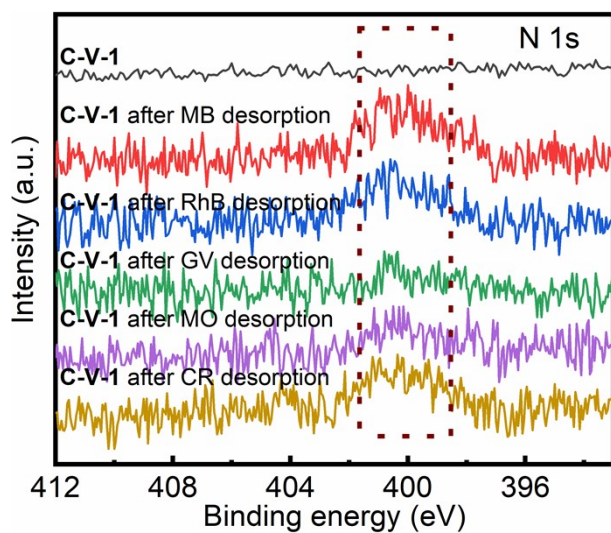

**Figure S17** XPS analysis of the N1s spectra for **C-V-1** and **C-V-1** after different dyes desorption.

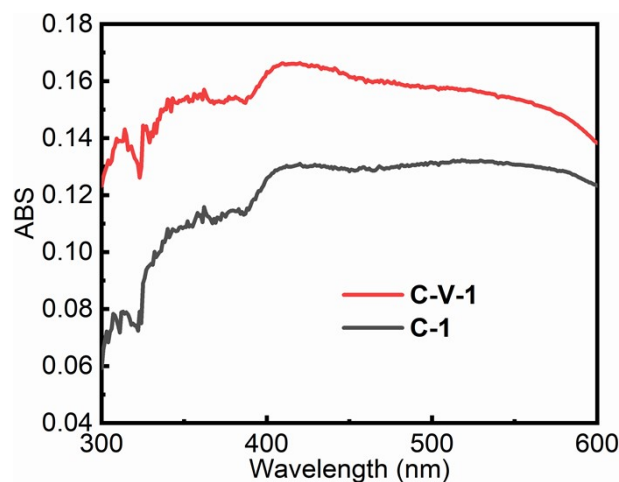

**Figure S18** Diffuse-reflectance spectra of C-1 and C-V-1 materials.

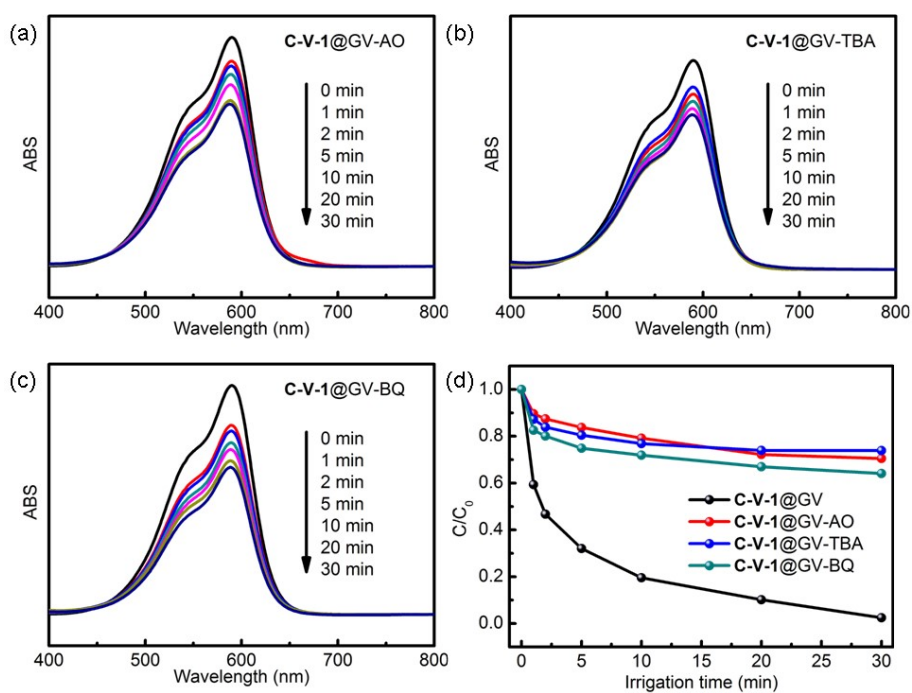

**Figure S19** UV-vis spectra of GV solution on the C-V-1 in presence of AO (a), TBA (b) and BQ (c). (d) The photodegradation rates of GV on the C-V-1 in presence of various scavengers.



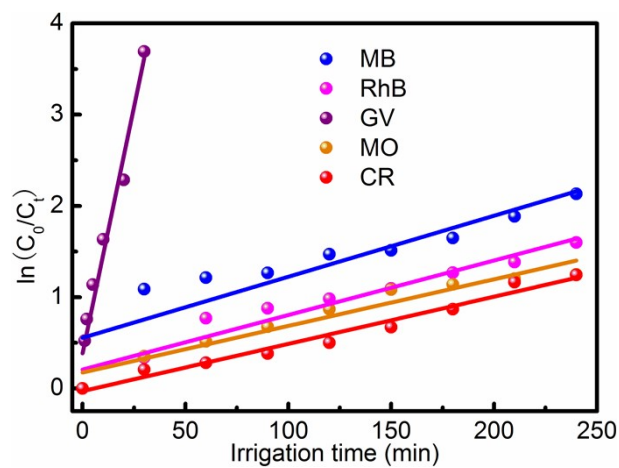

**Figure S20** Pseudo-first-order plots with respect to time for C-V-1 in aqueous dye solutions.

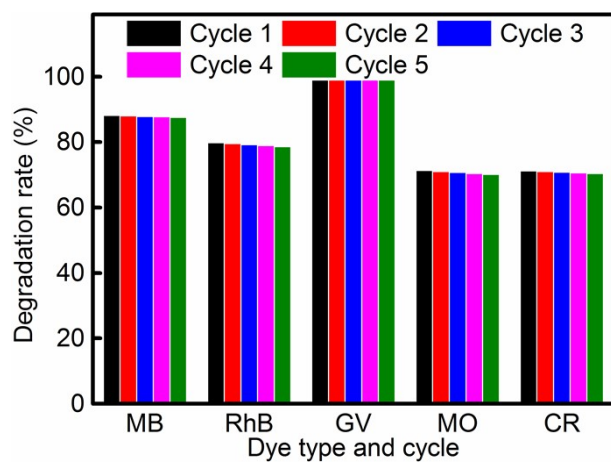

**Figure S21** The reproducibility of the photocatalyst C-V-1.

## References

- S1 H. Bantawal, U. S. Shenoy and D. K. Bhat, *Nanoscale Adv.*, 2021, **3**, 5301–5311.
- S2 C. W. Yeh, C. H. Hung, K. R. Wu and C. C. Yang, *Environ. Eng. Sci.*, 2014, **31**, 42–48.
- S3 A. J. Antony, S. M. J. Kala, C. Joel, R. B. Bennie and S. J. Praveendaniel, *Phys. Chem. Solids*, 2021, **157**, 110169.
- S4 A. Mase, T. Sugita, M. Mori, S. Iwamoto, T. Tokutome, K. Katayama and H. Itabashi, *Chem. Eng. J.*, 2013, **225**, 440–446.
- S5 M. Rafique, M. Hamza, M. Shakil, M. Irshad, M. B. Tahir and M. R. Kabli, *Appl. Nanosci.*, 2020, **10**, 2365–2374.
- S6 R. Salami, M. Amini, M. Bagherzadeh and H. Hosseini, *Appl. Organometal. Chem.*, 2019, **33**, e5127.
- S7 W. Zhang, Y. Y. Lan, M. T. Ma, S. Y. Chai, Q. T. Zuo, K. H. Kim and Y. Q. Gao, *Environ. Int.*, 2020, **142**, 105798.
- S8 A. A. Taha, A. A. Hriez, Y. N. Wu, H. T. Wang and F. T. Li, *J. Colloid Interface Sci.*, 2014, **417**, 199–205.
- S9 X. L. Wang, C. H. Gong, J. W. Zhang, L. L. Hou, J. Luan and G. C. Liu, *CrystEngComm*, 2014, **16**, 7745–7752.
- S10 X. L. Wang, L. F. Chen, G. C. Liu, J. Luan, J. J. Cao, C. H. Gong and Z. H. Chang, *Inorg. Chem. Commun.*, 2015, **53**, 64–67.
- S11 X. L. Wang, J. J. Sun, H. Y. Lin, Z. H. Chang and G. C. Liu, *Inorg. Chem. Commun.*, 2016, **73**, 152–156.
